## CORRECTION

# S6K links cell fate, cell cycle and nutrient response in *C. elegans* germline stem/progenitor cells

**Dorota Z. Korta, Simon Tuck and E. Jane Albert Hubbard**

There were errors published in *Development* **139**, 859-870.

The legend to Fig. 3E should read: Percentage of gonad arms containing meiotic (differentiated) nuclei in *rsk-1*, *glp-1(ar202)* and *glp-1(ar202) rsk-1* ( $n=22, 21, 59$ ) at the indicated stages.

Two strains reported as bearing *daf-16(mu86)* actually carry the *daf-16(m26)* allele. Correct genotypes for these strains listed in Tables S1, S6 and S7 and in experiments reported in Fig. 4A and Fig. 5E, as well as related text and legends are:

GC1238: *rrf-1(pk1417) daf-16(m26)*

VB1040: *daf-16(m26); rsk-1(sv31)*.

The conclusions of the paper are not altered by these errors. The authors apologise to readers for these mistakes.
